# Supplementary material
Source: ML conference proceedings conference paper supplement (https://openreview.net/forum?id=2Qrd-Yw4YmF)
Supplement: supplementary_material [file attachment]

## 423 A Training pseudocode

---

**Algorithm 1** SEQUENTIAL DEXTERITY: A bi-directional optimization framework for skill chaining

---

**Require:** sub-task MDPs  $\mathcal{M}_1, \dots, \mathcal{M}_K$

```

1: Initialize sub-policies  $\pi_\theta^1, \dots, \pi_\theta^K$ , transition feasibility function  $F_\omega^1, \dots, F_\omega^K$ , terminal state buffers
    $\mathcal{B}_T^1, \dots, \mathcal{B}_T^K$ , the sum of reward buffers  $\mathcal{B}_R^1, \dots, \mathcal{B}_R^K$ 
2: for iteration  $m = 0, 1, \dots, M$  do
3:   for each subtask  $i = 1, \dots, K$  do
4:     while until convergence of  $\pi_\theta^i$  do
5:       Rollout trajectories  $\tau = (s_0, a_0, r_0, \dots, s_T)$  with  $\pi_\theta^i$ 
6:       Update  $\pi_\theta^i$  by maximizing  $\mathbb{E}_{\pi^i} [\sum_{t=0}^{T-1} \gamma^t r_t^i]$ 
7:     end while
8:   end for ▷ Forward initialization
9:   for each subtask  $i = K, \dots, 1$  do
10:    while until convergence of  $\pi_\theta^i$  do
11:      Sample  $s_0$  from environment or  $\mathcal{B}_\beta^{i-1}$ 
12:      Rollout trajectories  $\tau = (s_0, a_0, r_0, \dots, s_T)$  with  $\pi_\theta^i$ 
13:      if  $c_t^i > h_t^i$  or terminate from environment then
14:         $\mathcal{B}_T^i \leftarrow \mathcal{B}_T^i \cup s_{[T-10:T]}, \mathcal{B}_R^i \leftarrow \mathcal{B}_R^i \cup [\sum_{t=0}^{T-1} r_t^i]$ 
15:      end if
16:      Update  $F^i$  with  $s_{[T-10:T]} \sim \mathcal{B}_T^{i-1}$  and  $[\sum_{t=0}^{T-1} r_t] \sim \mathcal{B}_R^i$ 
17:      Update  $\pi_\theta^i$  by maximizing  $\mathbb{E}_{\pi^i} [\sum_{t=0}^{T-1} \gamma^t r_t^i]$ 
18:    end while
19:   end for ▷ Backward finetuning
20: end for

```

---

## 424 B Real-world system setups

425 During real-world deployment, some observations used in the simulation are hard to accurately  
426 estimate (e.g., joint velocity, object velocity, etc.). We use the teacher-student policy distillation  
427 framework [6, 7, 49] to abstract away these observation inputs from the policy model. In each policy  
428 rollout, our system first uses the top-down camera view to perform a color-based segmentation to  
429 localize the target block piece given by the manual. Then, the robot calls motion planning API to  
430 move to the target location with OSC controller [50]. After that, our system uses the wrist camera  
431 view to track the segmentation and 6D pose of the object with a combination of color-based initial  
432 segmentation, Xmem segmentation tracker [51], and Densefusion pose estimator [52]. If the target  
433 object is deeply buried (as the case in the top left corner of Fig. 4), the transition feasibility function  
434 will inform the robot to execute the searching policy until the target appears. During the last insertion  
435 stage, the estimated 6D object pose will guide the robot policy to adjust its finger and wrist motion  
436 to align with the goal location as it learned in the simulation. Since simulating contact-rich insertion  
437 is still a research challenge in graphics, after the robot has placed the block to the target location, we  
438 perform a scripted pressing motion (spread out the entire hand and press down) on the target location  
439 to ensure a firm insert. More details about real-world system setups and results can be found in the  
440 Supplementary video.

## 441 C State Space in Simulation

### 442 C.1 Building Blocks

443 **Searching** Table.4 gives the specific information of the state space of the searching task.

444 **Orienting** Table.5 gives the specific information of the state space of the orienting task.

Table 4: Observation space of Search task.

| Index     | Description                                                 |
|-----------|-------------------------------------------------------------|
| 0 - 23    | dof position                                                |
| 23 - 46   | dof velocity                                                |
| 46 - 98   | fingertip pose, linear velocity, angle velocity (4 x 13)    |
| 98 - 111  | hand base pose, linear velocity, angle velocity             |
| 111 - 124 | object base pose, linear velocity, angle velocity           |
| 124 - 143 | the actions of the last timestep                            |
| 143 - 159 | motor tactile                                               |
| 159 - 160 | the number of pixels of the object exposed under the camera |

Table 5: Observation space of Orient and Grasp task.

| Index     | Description                                              |
|-----------|----------------------------------------------------------|
| 0 - 23    | dof position                                             |
| 23 - 46   | dof velocity                                             |
| 46 - 98   | fingertip pose, linear velocity, angle velocity (4 x 13) |
| 98 - 111  | hand base pose, linear velocity, angle velocity          |
| 111 - 124 | object base pose, linear velocity, angle velocity        |
| 124 - 143 | the actions of the last timestep                         |
| 143 - 159 | motor tactile                                            |

445 **Grasping** Table.5 gives the specific information of the state space of the grasping task.

**Inserting** Table.6 gives the specific information of the state space of the inserting task.

Table 6: Observation space of Insert task.

| Index     | Description                                              |
|-----------|----------------------------------------------------------|
| 0 - 23    | dof position                                             |
| 23 - 46   | dof velocity                                             |
| 46 - 98   | fingertip pose, linear velocity, angle velocity (4 x 13) |
| 98 - 111  | hand base pose, linear velocity, angle velocity          |
| 111 - 124 | object base pose, linear velocity, angle velocity        |
| 124 - 143 | the actions of the last timestep                         |
| 143 - 159 | motor tactile                                            |
| 159 - 166 | goal pose                                                |
| 166 - 169 | goal position - object position                          |
| 169 - 173 | goal rotation - object rotation                          |

446

## 447 C.2 Tool positioning

448 **Grasping** Table.5 gives the specific information of the state space of the grasping task.

449 **In-hand Orientation** Table.6 gives the specific information of the state space of the in-hand orienta-  
 450 tion task.

## 451 D Reward functions

### 452 D.1 Building Blocks

453 **Searching** Denote the  $\tau$  is the commanded torques at each timestep, the number of pixels of the  
 454 object exposed under the camera as  $P$ , the sum of the distance between each fingertip and the object as

Table 7: Domain randomization of all the sub-tasks.

| Parameter                 | Type     | Distribution | Initial Range |
|---------------------------|----------|--------------|---------------|
| <b>Robot</b>              |          |              |               |
| Mass                      | Scaling  | uniform      | [0.5, 1.5]    |
| Friction                  | Scaling  | uniform      | [0.7, 1.3]    |
| Joint Lower Limit         | Scaling  | loguniform   | [0.0, 0.01]   |
| Joint Upper Limit         | Scaling  | loguniform   | [0.0, 0.01]   |
| Joint Stiffness           | Scaling  | loguniform   | [0.0, 0.01]   |
| Joint Damping             | Scaling  | loguniform   | [0.0, 0.01]   |
| <b>Object</b>             |          |              |               |
| Mass                      | Scaling  | uniform      | [0.5, 1.5]    |
| Friction                  | Scaling  | uniform      | [0.5, 1.5]    |
| Scale                     | Scaling  | uniform      | [0.95, 1.05]  |
| <b>Observation</b>        |          |              |               |
| Obs Correlated. Noise     | Additive | gaussian     | [0.0, 0.001]  |
| Obs Uncorrelated. Noise   | Additive | gaussian     | [0.0, 0.002]  |
| <b>Action</b>             |          |              |               |
| Action Correlated Noise   | Additive | gaussian     | [0.0, 0.015]  |
| Action Uncorrelated Noise | Additive | gaussian     | [0.0, 0.05]   |
| <b>Environment</b>        |          |              |               |
| Gravity                   | Additive | normal       | [0, 0.4]      |

455  $\sum_{i=0}^4 \mathbf{f}_i$ , the action penalty as  $\|\mathbf{a}\|_2^2$ , and the torque penalty as  $\|\tau\|_2^2$ . Finally, the rewards are given by  
 456 the following specific formula:

$$r = \lambda_1 * \mathbf{P} + \lambda_2 * \min(\sum_{i=0}^4 \mathbf{f}_i - e_0, 0) + \lambda_3 * \|\mathbf{a}\|_2^2 + \lambda_4 * \|\tau\|_2^2 \quad (3)$$

457 where  $\lambda_1 = 5.0$ ,  $\lambda_2 = 1.0$ ,  $\lambda_3 = -0.001$ ,  $\lambda_4 = -0.003$ , and  $e_0 = 0.2$ .

458 **Orienting** Denote the  $\tau$  is the commanded torques at each timestep, the angle of rotation of the object  
 459 as  $\theta$ , the sum of the distance between each fingertip and the object as  $\sum_{i=0}^4 \mathbf{f}_i$ , the action penalty as  
 460  $\|\mathbf{a}\|_2^2$ , and the torque penalty as  $\|\tau\|_2^2$ . Finally, the rewards are given by the following specific formula:

$$r = \lambda_1 * \theta + \lambda_2 * \min(\sum_{i=0}^4 \mathbf{f}_i - e_0, 0) + \lambda_3 * \|\mathbf{a}\|_2^2 + \lambda_4 * \|\tau\|_2^2 \quad (4)$$

461 where  $\lambda_1 = 1.0$ ,  $\lambda_2 = 1.0$ ,  $\lambda_3 = -0.001$ ,  $\lambda_4 = -0.003$ , and  $e_0 = 0.6$ .

462 **Grasping** Denote the  $\tau$  is the commanded torques at each timestep, the sum of the distance between  
 463 each fingertip and the object as  $\sum_{i=0}^4 \mathbf{f}_i$ , the action penalty as  $\|\mathbf{a}\|_2^2$ , and the torque penalty as  $\|\tau\|_2^2$ .  
 464 Finally, the rewards are given by the following specific formula:

$$r = \lambda_1 * \exp[\alpha_0 * \min(\sum_{i=0}^4 \mathbf{f}_i - e_0, 0)] + \lambda_2 * \|\mathbf{a}\|_2^2 + \lambda_3 * \|\tau\|_2^2 \quad (5)$$

465 where  $\lambda_1 = 1.0$ ,  $\lambda_2 = -0.001$ ,  $\lambda_3 = -0.003$ ,  $\alpha_0 = -5.0$ , and  $e_0 = 0.1$ . It is worth noting that in the  
 466 latter half of our grasping training, we force the hand to lift, so if the grip is unstable, the object will  
 467 drop and the reward will decrease.

468 **Inserting** Denote the  $\tau$  is the commanded torques at each timestep, the object and goal position as  $x_o$   
 469 and  $x_g$ , the angular position difference between the object and the goal as  $d_a$ , the sum of the distance  
 470 between each fingertip and the object as  $\sum_{i=0}^4 \mathbf{f}_i$ , the action penalty as  $\|\mathbf{a}\|_2^2$ , and the torque penalty as  
 471  $\|\tau\|_2^2$ . Finally, the rewards are given by the following specific formula:

$$r = \lambda_1 * \exp[-(\alpha_0 * \|x_o - x_g\|_2 + \alpha_1 * 2 * \arcsin(\text{clamp}(\|d_a\|_2, 0, 1)))] + \lambda_2 * \min(\sum_{i=0}^4 \mathbf{f}_i - e_0, 0) + \lambda_3 * \|\mathbf{a}\|_2^2 + \lambda_4 * \|\tau\|_2^2 \quad (6)$$

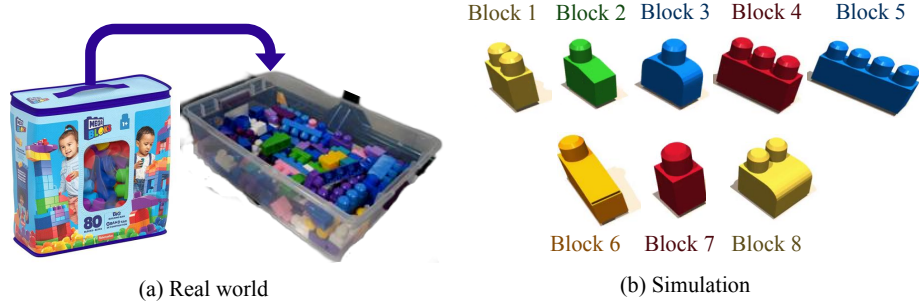

Figure 6: The block model we use in simulation and real-world. (b) is the eight blocks used in our building blocks task. The upper Block 1-5 is the training block, and the lower Block 6-8 is the unseen block for testing.

where  $\lambda_1 = 1.0$ ,  $\lambda_2 = 0.0$ ,  $\lambda_3 = -0.001$ ,  $\lambda_4 = -0.003$ ,  $\alpha_0 = 1.0$ ,  $\alpha_1 = 20.0$ , and  $e_0 = 0.06$ .

## D.2 Tool positioning

**Grasping** Denote the  $\tau$  is the commanded torques at each timestep, the sum of the distance between each fingertip and the object as  $\sum_{i=0}^4 f_i$ , the action penalty as  $\|\mathbf{a}\|_2^2$ , and the torque penalty as  $\|\tau\|_2^2$ . Finally, the rewards are given by the following specific formula:

$$r = \lambda_1 * \exp[\alpha_0 * \min(\sum_{i=0}^4 f_i - e_0, 0)] + \lambda_2 * \|\mathbf{a}\|_2^2 + \lambda_3 * \|\tau\|_2^2 \quad (7)$$

where  $\lambda_1 = 1.0$ ,  $\lambda_2 = -0.001$ ,  $\lambda_3 = -0.003$ ,  $\alpha_0 = -5.0$ , and  $e_0 = 0.1$ . It is worth noting that in the latter half of our grasping training, we force the hand to lift, so if the grip is unstable, the object will drop and the reward will decrease.

**In-hand Orientation** Denote the  $\tau$  is the commanded torques at each timestep, the object and goal position as  $x_o$  and  $x_g$ , the angular position difference between the object and the goal as  $d_a$ , the sum of the distance between each fingertip and the object as  $\sum_{i=0}^4 f_i$ , the action penalty as  $\|\mathbf{a}\|_2^2$ , and the torque penalty as  $\|\tau\|_2^2$ . Finally, the rewards are given by the following specific formula:

$$r = \lambda_1 * \exp[-(\alpha_0 * \|x_o - x_g\|_2 + \alpha_1 * 2 * \arcsin(\text{clamp}(\|d_a\|_2, 0, 1)))] + \lambda_2 * \min(\sum_{i=0}^4 f_i - e_0, 0) + \lambda_3 * \|\mathbf{a}\|_2^2 + \lambda_4 * \|\tau\|_2^2 \quad (8)$$

where  $\lambda_1 = 1.0$ ,  $\lambda_2 = 0.0$ ,  $\lambda_3 = -0.001$ ,  $\lambda_4 = -0.003$ ,  $\alpha_0 = 1.0$ ,  $\alpha_1 = 20.0$ , and  $e_0 = 0.06$ .

## E Domain Randomization

Isaac Gym provides lots of domain randomization functions for RL training. We add the randomization for all the sub-tasks as shown in Table. 7 for each environment. we generate new randomization every 1000 simulation steps.

## F Task Setups

### F.1 Building Blocks

**Block model.** For the building blocks task, we use the same model as Mega Bloks<sup>1</sup> as our blocks. It is a range of large, stackable construction blocks designed specifically for the small hands of the children.

<sup>1</sup><https://www.megabrand.com/en-us/mega-bloks>.

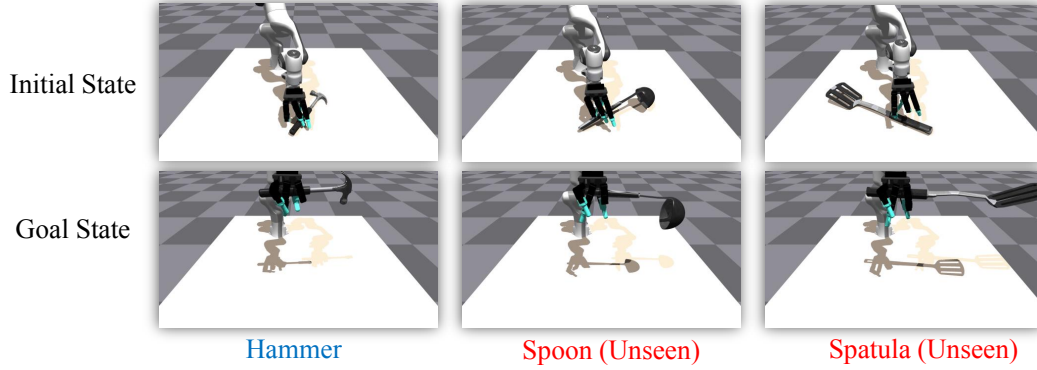

Figure 7: Visualization of the three tools we use in Tool Positioning task. The Hammer is use for training and the Spoon and Spatula is only use for testing. We also show the goal pose of the tools.

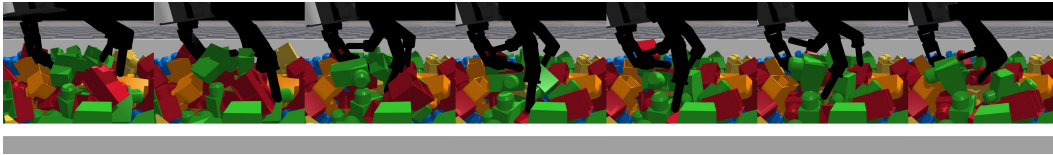

Figure 8: Snapshot of the searching task.

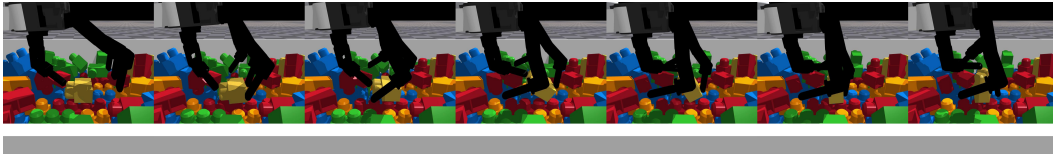

Figure 9: Snapshot of the orienting task.

We take eight different types of blocks (denoted as Block 1, Block 2,..., Block 8) as the models of our block, and carefully measured the dimensions to ensure that they were the same as in the real world. The block datasets is shown in Figure. 6. For all building block sub-tasks, we use Block 1-5 as the training object and Block 6-8 as the unseen object for testing.

**Physics in insertion between two blocks.** It is difficult to simulate the realistic insertion in the simulator, and it is easy to explode or model penetration when the two models are in frequent contact. Therefore, we want the plug and slot between the two blocks can be inserted without frequent friction. We reduced the diameter of all block plugs and convex decomposed them via VHACD method when loaded into Isaac Gym. Finally, we made one block possible to insert another block through free fall to verify the final effect.

## F.2 Tool positioning

For the tool positioning task, we have a total of three tools: hammer, spatula, and spoon. We use the hammer for training and test both in the hammer, spatula, and spoon. This long-horizon task involves grasp a tool and re-orient it onto a pose suitable for its use. Fig.7 shows what they look like and the initial and goal state of the each three tools.

## F.3 Typical frames of all sub-tasks

For the convenience of readers, we show some typical frames of all the sub-tasks in simulation.

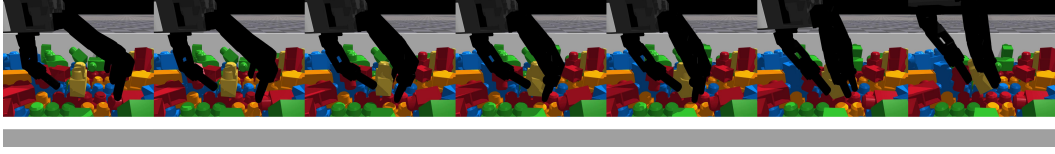

Figure 10: Snapshot of the grasping task.

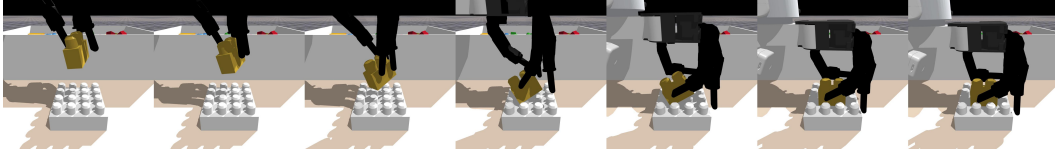

Figure 11: Snapshot of the inserting task.

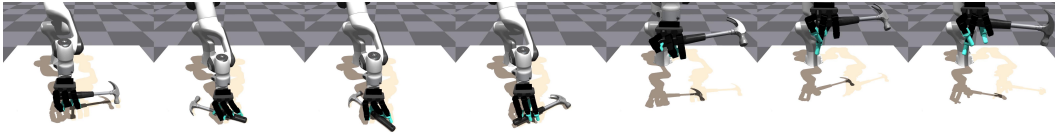

Figure 12: Snapshot of the hammer positioning.

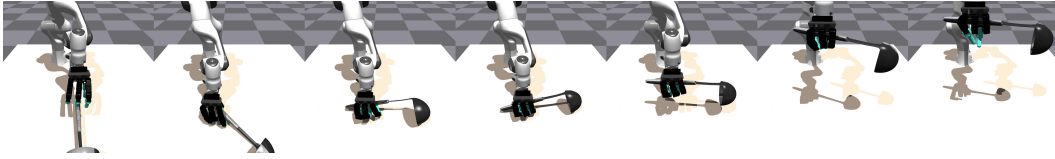

Figure 13: Snapshot of the spoon positioning.

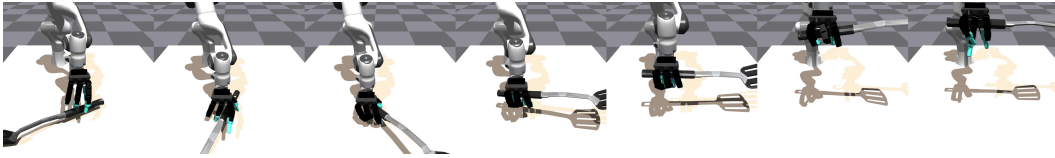

Figure 14: Snapshot of the spatula positioning.

|                       | Trained                           | Unseen                            | All                               |
|-----------------------|-----------------------------------|-----------------------------------|-----------------------------------|
| Ours w/o belief state | $0.40 \pm 0.08$                   | $0.16 \pm 0.07$                   | $0.29 \pm 0.06$                   |
| Ours w/o tactile      | <b><math>0.43 \pm 0.04</math></b> | $0.33 \pm 0.00$                   | $0.37 \pm 0.02$                   |
| Ours w/o both         | $0.26 \pm 0.05$                   | $0.02 \pm 0.01$                   | $0.14 \pm 0.02$                   |
| Ours                  | <b><math>0.43 \pm 0.04</math></b> | <b><math>0.36 \pm 0.04</math></b> | <b><math>0.38 \pm 0.04</math></b> |

Table 8: Ablation study on the system choices in single-step **Orient** task.

### 510 F.3.1 Building Blocks

### 511 F.3.2 Tool Positioning

## 512 G Motor tactile and belief state.

513 We found that motor tactile and belief state are beneficial for dexterous in-hand manipulation. Tab. 8  
 514 is the ablation study of the design choices of our input state space. We modify the goal of the Orient  
 515 sub-task in the building blocks task to a pre-defined goal orientation and train each ablation method

only on this sub-policy. We find the belief state pose estimator has the highest improvement (9% in task success rate), which highlights its effects on in-hand manipulation.

## G.1 Hyperparameters of the PPO

### G.1.1 Building Blocks

Table 9: Hyperparameters of PPO in Building Blocks.

| Hyperparameters          | Searching         | Orienting         | Grasping & Inserting |
|--------------------------|-------------------|-------------------|----------------------|
| Num mini-batches         | 4                 | 4                 | 8                    |
| Num opt-epochs           | 5                 | 10                | 2                    |
| Num episode-length       | 8                 | 20                | 8                    |
| Hidden size              | [1024, 1024, 512] | [1024, 1024, 512] | [1024, 1024, 512]    |
| Clip range               | 0.2               | 0.2               | 0.2                  |
| Max grad norm            | 1                 | 1                 | 1                    |
| Learning rate            | 3.e-4             | 3.e-4             | 3.e-4                |
| Discount ( $\gamma$ )    | 0.96              | 0.96              | 0.9                  |
| GAE lambda ( $\lambda$ ) | 0.95              | 0.95              | 0.95                 |
| Init noise std           | 0.8               | 0.8               | 0.8                  |
| Desired kl               | 0.016             | 0.016             | 0.016                |
| Ent-coef                 | 0                 | 0                 | 0                    |

### G.1.2 Tool Positioning

Table 10: Hyperparameters of PPO in Tool Positioning.

| Hyperparameters          | Grasping          | In-hand Orienting |
|--------------------------|-------------------|-------------------|
| Num mini-batches         | 4                 | 4                 |
| Num opt-epochs           | 5                 | 10                |
| Num episode-length       | 8                 | 20                |
| Hidden size              | [1024, 1024, 512] | [1024, 1024, 512] |
| Clip range               | 0.2               | 0.2               |
| Max grad norm            | 1                 | 1                 |
| Learning rate            | 3.e-4             | 3.e-4             |
| Discount ( $\gamma$ )    | 0.96              | 0.96              |
| GAE lambda ( $\lambda$ ) | 0.95              | 0.95              |
| Init noise std           | 0.8               | 0.8               |
| Desired kl               | 0.016             | 0.016             |
| Ent-coef                 | 0                 | 0                 |
